# Supplementary material for: The Abundance of Tumor-Infiltrating CD8+ Tissue Resident Memory T Lymphocytes Correlates with Patient Survival in Glioblastoma
Source: MDPI journal article supplement (doi:10.3390/biomedicines10102454), 2022-10-01
Supplement: s1 [file s1]

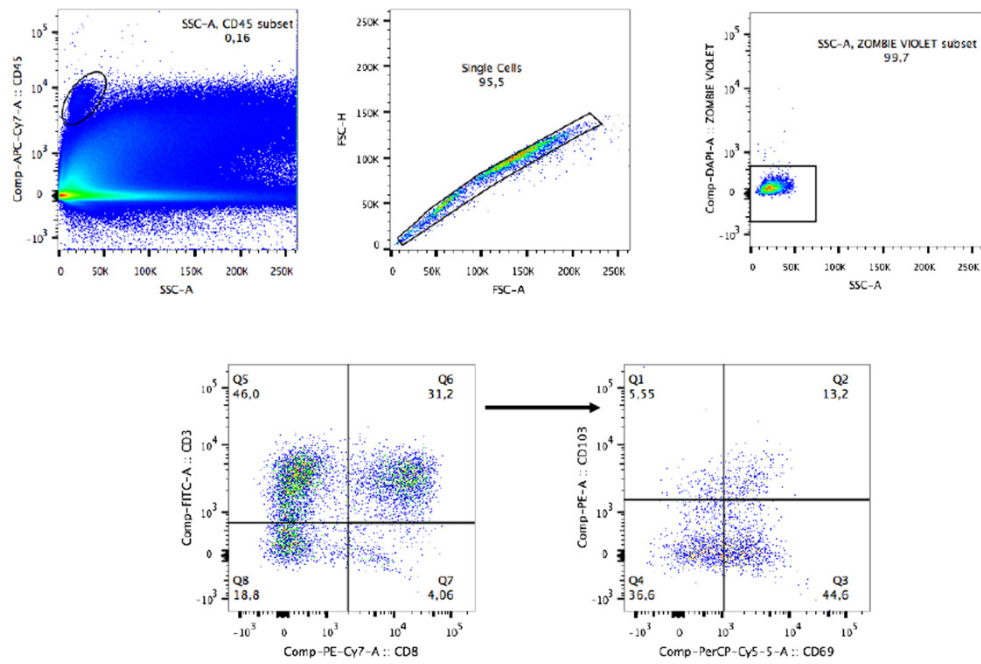

Supplemental Figure S1. Representative dot plots showing the gating strategy used for the identification of CD8<sup>+</sup> TRM cells.
